# Supplementary material for: Proteomic and Metabolomic Evaluation of Insect- and Herbicide-Resistant Maize Seeds
Source: MDPI journal article supplement (doi:10.3390/metabo12111078), 2022-11-07
Supplement: s1 [file s1]

## Article

# Proteomic and metabolomic evaluation of insect- and herbicide-resistant maize seeds

Weixiao Liu, Lixia Meng, Weiling Zhao, Zhanchao Wang, Chaohua Miao, Yusong Wan and Wujun Jin\*

Biotechnology Research Institute, Chinese Academy of Agricultural Sciences, Beijing 100081, China

\* Correspondence: jinwujun@caas.cn

## Materials and methods

### 1. Protein preparation and trypsin digestion

Maize seeds were ground in liquid nitrogen and incubated in lysis buffer (Genecreate, Wuhan, China) (7 M of urea, 2 M of thiourea, 4% SDS, and 40 mM of Tris-HCl (pH 8.5)) containing 1 mM of PMSF and 2 mM of EDTA (final concentration) for 5 min; then, 10 mM of DTT (Sigma, Shanghai, China) (final concentration) was added to the sample. The suspension was sonicated for 10 min on ice and then centrifuged at 4 °C and 13,000 rpm for 20 min. The supernatant was mixed with 4 volumes of pre-cooled acetone at −20 °C for 2 h. After centrifugation, the protein pellets were air-dried and resuspended in 8 M of urea/100 mM of TEAB (Sigma, Shanghai, China). The protein samples were reduced with 10 mM of DTT at 56 °C for 30 min and then alkylated with 50 mM of iodoacetamide (IAM) (Sigma, Shanghai, China) at room temperature for 30 min in the dark. Next, 4 volumes of pre-cooled acetone were added at −20 °C for 2 h. After centrifugation, the protein pellets were air-dried and resuspended in 8 M of urea (Sigma, Shanghai, China) /100 mM of TEAB (pH 8.0). Then, the total protein concentration was measured using the Bradford method.

Trypsin (MS grade, Sigma, Shanghai, China) and 100 µg of protein from each sample were mixed at an enzyme–protein ratio of 1:50 (w/w). Digestion was performed at 37 °C for 16 h. After digestion, the peptides were desalted using C18 columns and dried with a vacuum concentration.

### 2. LC–MS/MS analysis

The dried peptide sample was reconstituted with a 0.1% formic acid (FA) (HPLC grade, Sigma, Shanghai, China) aqueous solution and then centrifuged at 15,000 rpm for 10 min. Then, the sample solution was analyzed by HPLC–MS. The peptides were dissolved in mobile phase A (0.1% FA aqueous solution) and then separated using EASY-nLC 1200 ultra-high performance liquid system (Thermo Fisher Scientific, Waltham, MA, USA). The peptides were bound to the C18 capture column and the analytical column (Eksigent, San Francisco, CA, USA), then separated using a Q-Exactive HF (Thermo Fisher Scientific, Waltham, MA, USA) equipped with an EASY-Spray nanoliter electric spray ion source. Two mobile phases (A: 0.1% FA; B: 80% acetonitrile (ACN) (HPLC grade, Sigma, Shanghai, China), 0.1% FA) were used to establish analytical gradients over 60, 90, and 120 min. The flow rate of the liquid phase was set to 300 nL/min. After separation from the nanoliter liquid phase, the peptides were ionized by a nanoliter electric spray ion source, which could convert the ions from the solution into gas-phase ions. The gas-phase ions entered the Q-Exactive HF, and the exact mass of the parent ions and the information on the fragment ions were used to determine the peptide sequence.

### 3. UPLC Conditions and ESI-Q TRAP-MS/MS

The extracted metabolites were analyzed using an UPLC–ESI-MS/MS system (UPLC, Shim-pack UFLC SHIMADZU CBM30A system; MS, Applied Biosystems 4500 Q TRAP). The analytical conditions were as follows: UPLC: column, Agilent SB-C18 (1.8  $\mu$ m, 2.1 mm  $\times$  100 mm); mobile phase consisting of solvent A (98% DDH<sub>2</sub>O, 0.1% FA) and solvent B (ACN). Sample measurements were performed with a gradient program that employed the starting conditions of 95% A and 5% B. Within 9 min, a linear gradient to 5% A and 95% B was programmed, and a composition of 5% A and 95% B was maintained for 1 min. Subsequently, the composition was adjusted to 95% A and 5.0% B within 1.10 min and maintained for 2.9 min. The column oven was set to 40 °C, while the injection volume was 4  $\mu$ L. The effluent was alternatively connected to an ESI-triple quadrupole-linear ion trap (QTRAP)-M.

The ESI source operation parameters were as follows: ion source and turbo spray; source temperature of 550 °C; ion spray voltage (IS) of 5500 V (positive ion mode)/–4500 V (negative ion mode); ion source gas I (GSI), gas II (GSII), and curtain gas (CUR) set at 50, 60, and 30.0 psi, respectively; high collision gas (CAD). Instrument tuning and mass calibration were performed with 10 and 100  $\mu$ mol/L polypropylene glycol solutions in QQQ and LIT modes, respectively. QQQ scans were acquired as MRM experiments with the collision gas (nitrogen) set to 5 psi. The DP and CE for individual MRM transitions were carried out with further DP and CE optimization. A specific set of MRM transitions were monitored for each period according to the metabolites eluted within this period.

### 4. Data analysis

MaxQuant 1.6.17.0 was used to retrieve and analyze the mass spectrometry data. Protein identification was performed against the UniProt *Zea mays* (maize) database supplemented with four foreign proteins, namely, EPSPS, Cry1Ab, Cry3Bb, and Cry1F.

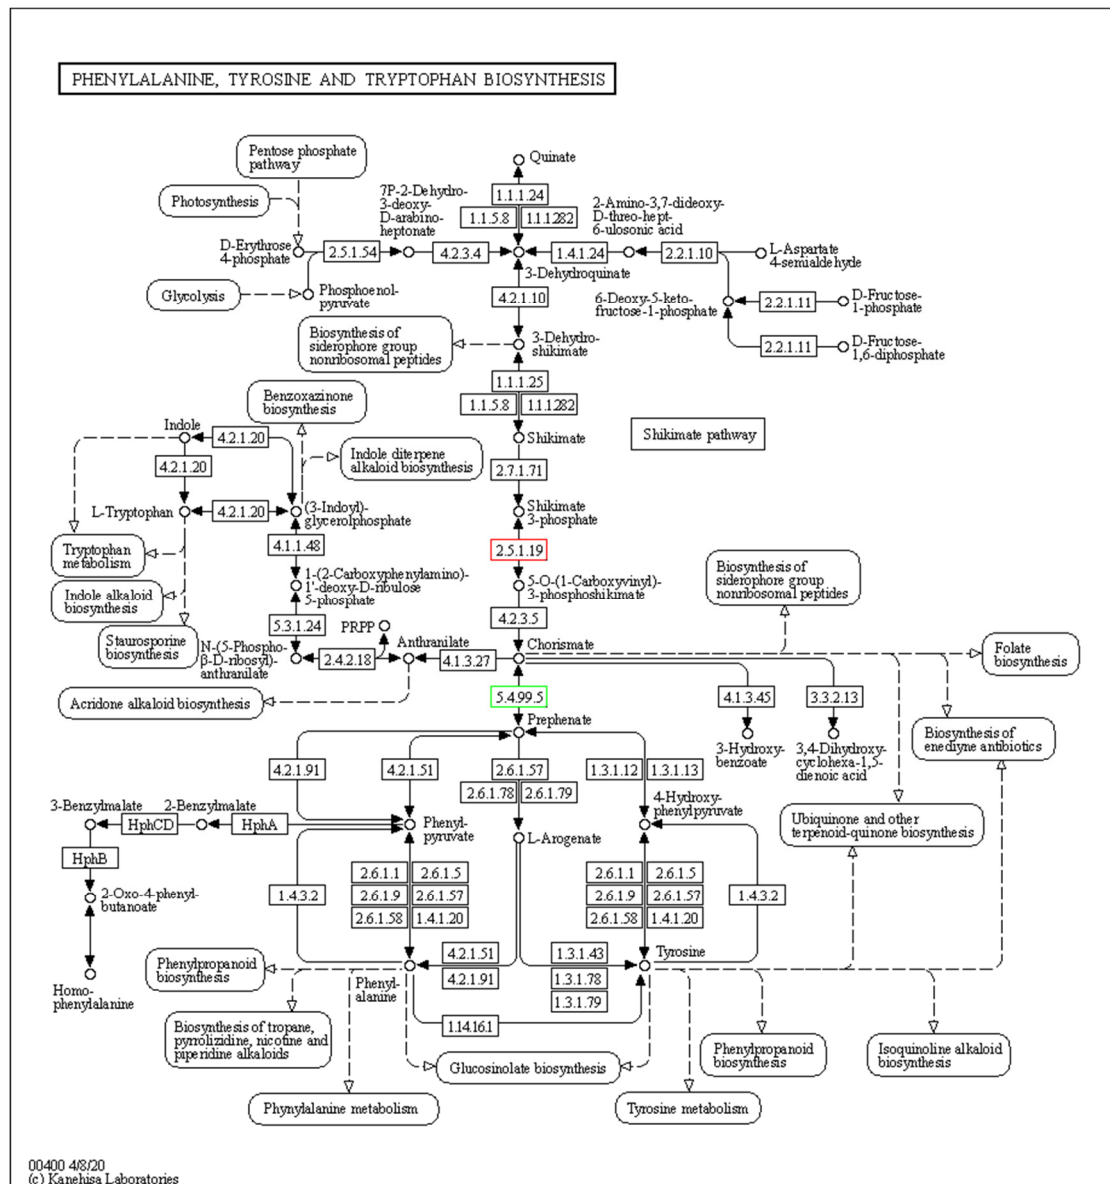

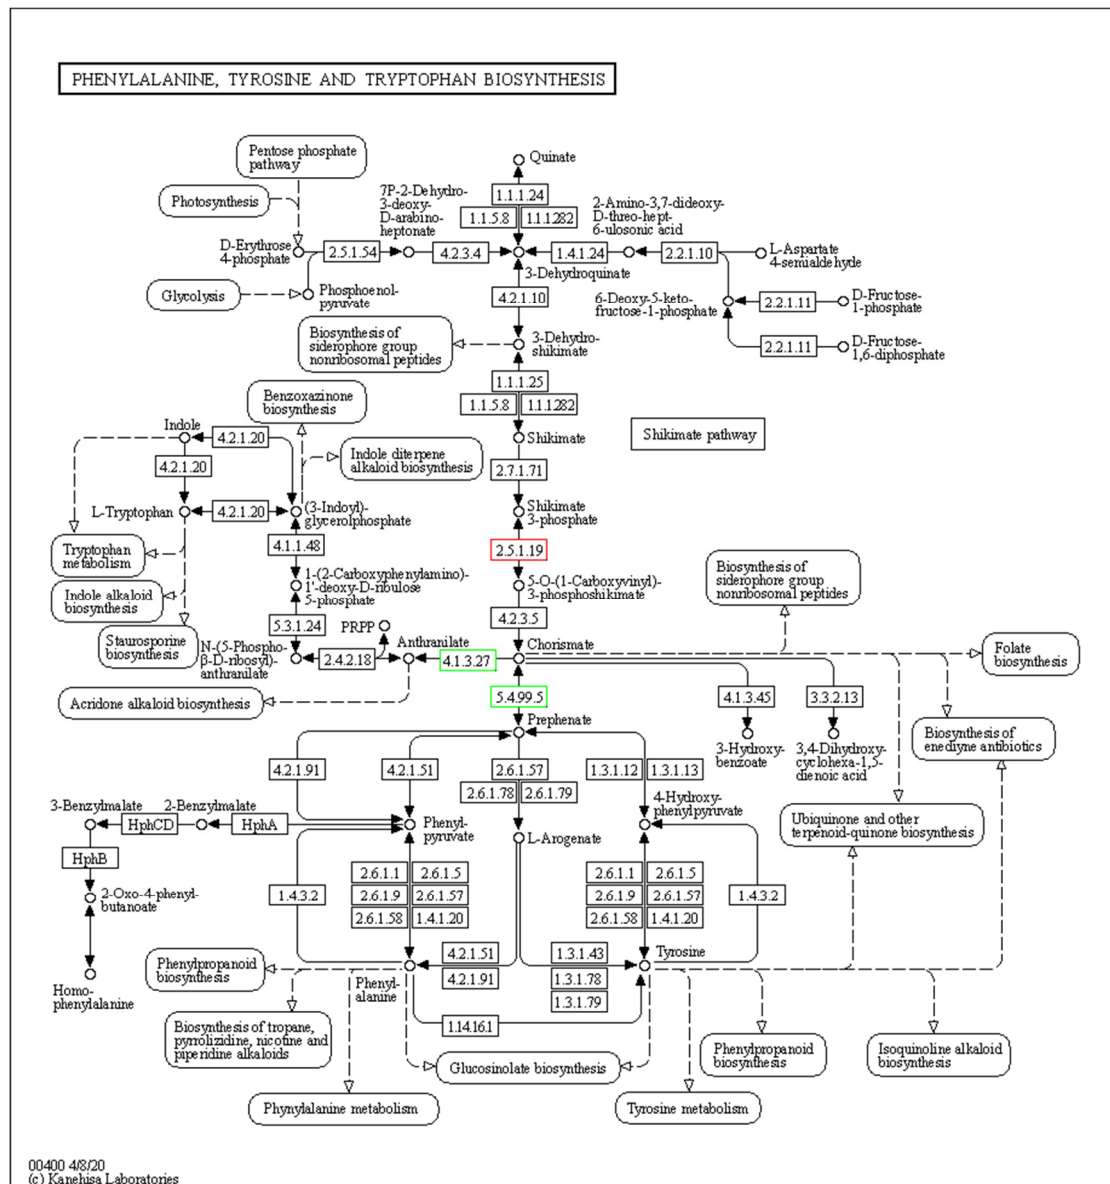

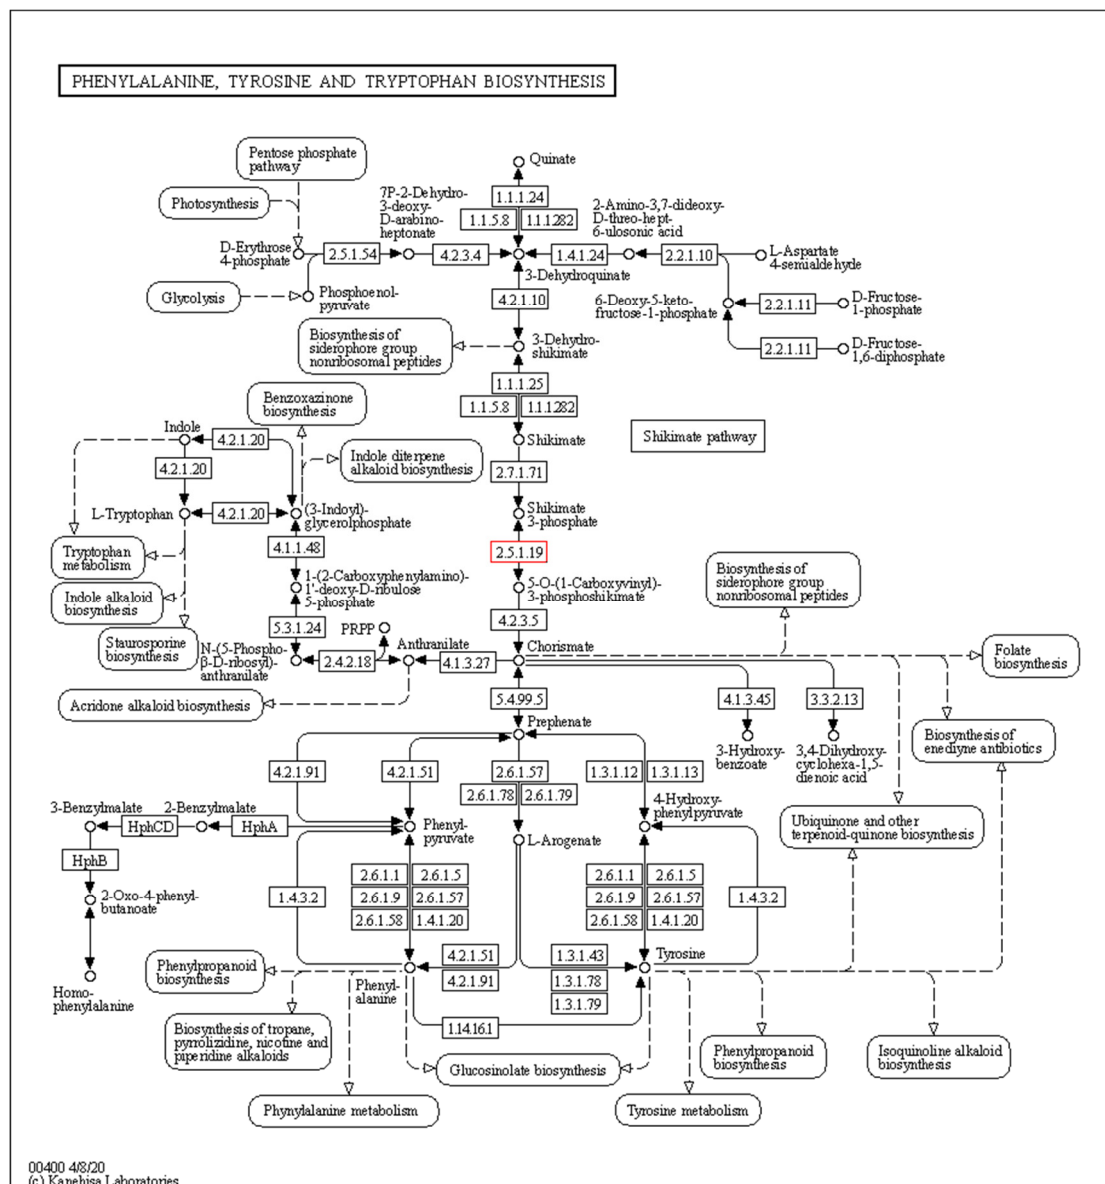

**Figure S3.** DEPs of BFL-2/ZH58×CH72 enriched in protein processing in the endoplasmic reticulum. Red indicates relatively high expression, green indicates relatively low expression, and white indicates the same expression levels in the two lines.

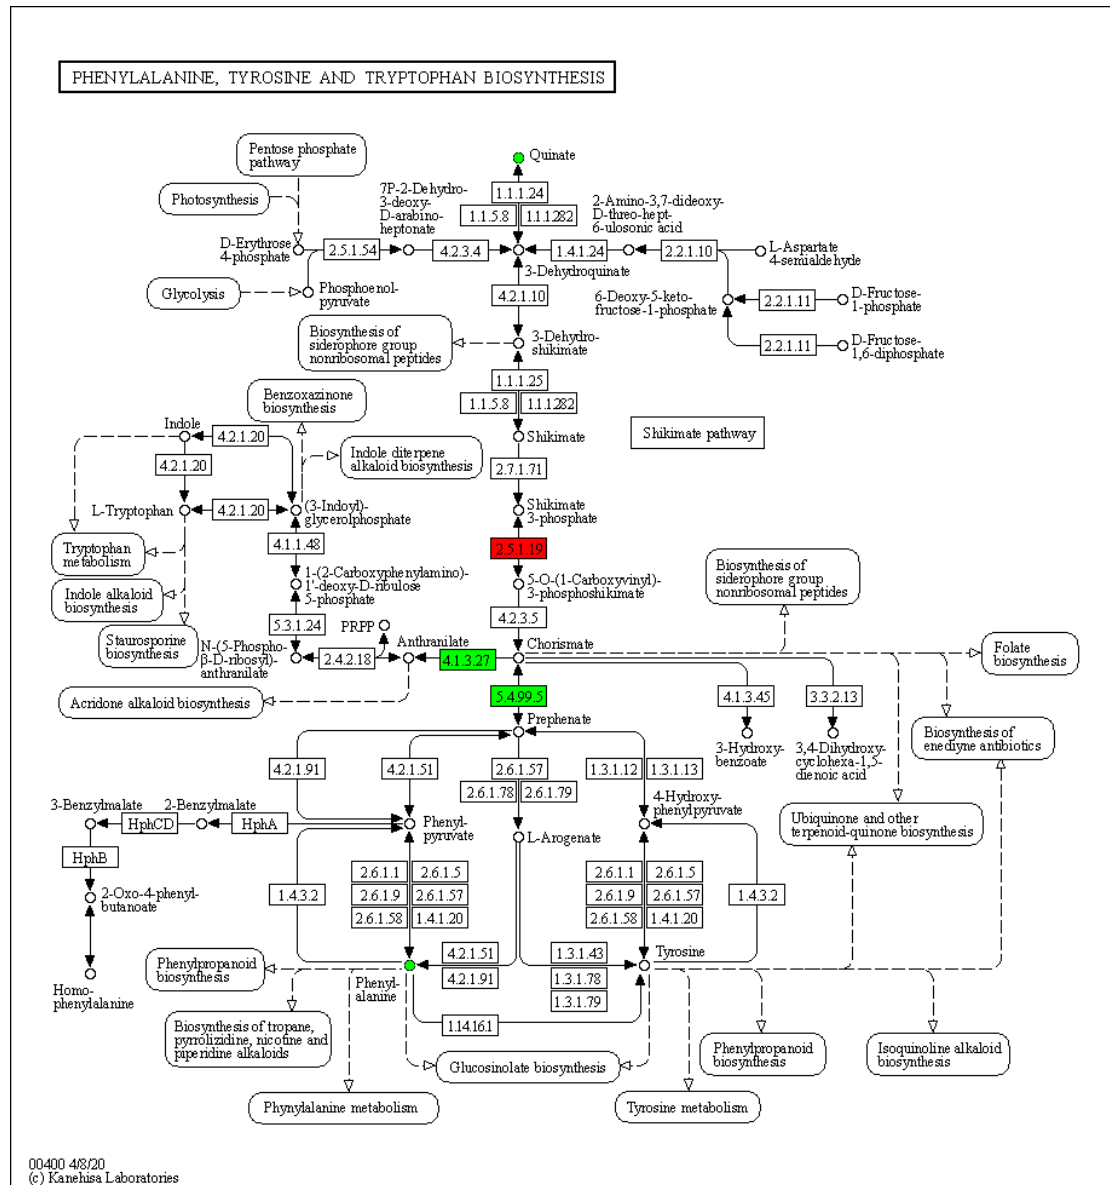

**Figure S4.** The integrated analyses of DEPs and DAMs of BFL-1/ZH58 enriched in protein processing in the endoplasmic reticulum. Red indicates relatively high expression, green indicates relatively low expression, and white indicates the same expression levels in the two lines. Square indicates protein, and circle indicates metabolite.

**Table S1.** Primers for PCR detection of transgenic maize.

| Primers                 | Sequence of primers (5'-3')  | Size of fragment (bp) |
|-------------------------|------------------------------|-----------------------|
| BBL2-2 event-specific F | TACTAGATCGGGAATTAAACTATCAGTG | 168                   |
| BBL2-2 event-specific R | ACCTGGCACAGCACACATAGAG       |                       |
| BFL4-2 event-specific F | GGCAATAAGAGTACAAAGATGAACA    | 271                   |
| BFL4-2 event-specific R | AGATCGGGAATTAAACTATCAGTGT    |                       |
| BBL2-2 EPSPS F          | CGGTCTCCACGCTGAAG            | 444                   |
| BBL2-2 EPSPS R          | AGCCTTCGTATCGGAGAGT          |                       |
| BFL4-2 EPSPS F          | CATTCCAGGCGACAAGTCTATCT      | 662                   |
| BFL4-2 EPSPS R          | CGCCTGGGACATCAATCACT         |                       |
| Cry1Ab F                | ATGGACAACAACCCGAACA          | 829                   |
| Cry1Ab R                | CGAAGTTCTCCAGGACGGG          |                       |
| Cry3Bb F                | AGTCGTTCTCAACACCATCTG        | 593                   |
| Cry3Bb R                | GCGGATGTCGTAGAAGGGG          |                       |
| Cry1F F                 | ACAACATCCAGAACCAGTGCG        | 1951                  |
| Cry1F-R                 | CAGAACTCGTCAGAGAGGCACT       |                       |

**Table S2.** The list of DEPs in BBL/ZH58.

| Accession  | Description                                          | Mol. weight [kDa] | BBL/ZH58 | BBL/ZH58 PVal             | BBL/ZH58 State |
|------------|------------------------------------------------------|-------------------|----------|---------------------------|----------------|
| epsps      | epsps                                                | 47.614            | 172.77   | 1.46348×10 <sup>-6</sup>  | up             |
| Cry1Ab     | Cry1Ab                                               | 91.956            | 3.199    | 0.000658169               | up             |
| O64964     | Aquaporin TIP1-1                                     | 25.821            | 0.464    | 3.98072×10 <sup>-7</sup>  | down           |
| Q94IM1     | 22 kDa alpha-zein 14                                 | 28.934            | 5.72     | 3.50994×10 <sup>-13</sup> | up             |
| P04706     | Glutelin-2                                           | 23.688            | 0.351    | 4.03766×10 <sup>-8</sup>  | down           |
| P06673     | Zein-beta                                            | 19.531            | 2.088    | 8.37627×10 <sup>-10</sup> | up             |
| P49106     | 14-3-3-like protein GF14-6                           | 29.662            | 0.422    | 2.42053×10 <sup>-5</sup>  | down           |
| P81008     | Defensin-like protein 1                              | 5.199             | 2.152    | 1.53938×10 <sup>-7</sup>  | up             |
| P83506     | Probable non-specific lipid-transfer protein 2       | 7.3115            | 2.375    | 5.92951×10 <sup>-5</sup>  | up             |
| Q41819     | Indole-3-acetate beta-glucosyltransferase            | 49.71             | 2.077    | 4.1027×10 <sup>-7</sup>   | up             |
| A0A1D6DXF6 | Eukaryotic translation initiation factor 3 subunit C | 106.06            | 2.012    | 1.19981×10 <sup>-9</sup>  | up             |
| A0A1D6EWX3 | Aconitate hydratase                                  | 107.26            | 0.105    | 4.9225×10 <sup>-8</sup>   | down           |
| A0A1D6F072 | Indole-3-acetic acid amido synthetase                | 67.209            | 0.375    | 2.36457×10 <sup>-5</sup>  | down           |
| A0A1D6GGD7 | Allene oxide synthase chloroplastic                  | 56.583            | 2.2      | 1.9631×10 <sup>-5</sup>   | up             |
| A0A1D6HBQ7 | Uncharacterized protein                              | 15.344            | 0.411    | 3.66757×10 <sup>-5</sup>  | down           |
| A0A1D6HBT3 | Glycine-rich cell wall structural protein            | 11.918            | 2.248    | 8.01337×10 <sup>-7</sup>  | up             |
| A0A1D6HEN7 | Vacuolar processing enzyme 1                         | 54.623            | 0.413    | 1.09034×10 <sup>-9</sup>  | down           |
| A0A1D6HUR0 | Uncharacterized protein                              | 19.01             | 2.882    | 0.000147939               | up             |
| A0A1D6I4V5 | Alanine aminotransferase 2 mitochondrial             | 50.682            | 4.425    | 2.59007×10 <sup>-11</sup> | up             |
| A0A1D6IN22 | Glycosyltransferase                                  | 52.397            | 2.408    | 6.13933×10 <sup>-11</sup> | up             |
| A0A1D6JTL4 | Caleosin                                             | 27.243            | 0.069    | 1.07129×10 <sup>-7</sup>  | down           |
| A0A1D6KSA0 | Tonoplast intrinsic protein3                         | 27.361            | 2.071    | 2.78847×10 <sup>-5</sup>  | up             |
| B4F817     | Dehydroascorbate reductase                           | 23.419            | 2.013    | 1.26182×10 <sup>-7</sup>  | up             |
| A0A1D6M3X4 | Peptidase A1 domain-containing protein               | 44.884            | 2.29     | 5.90069×10 <sup>-10</sup> | up             |
| A0A1D6MA73 | Pistil-specific extensin-like protein                | 21.086            | 2.365    | 1.5193×10 <sup>-7</sup>   | up             |
| A0A1D6N932 | Osmotin-like proteinM34                              | 23.069            | 2.141    | 4.55393×10 <sup>-10</sup> | up             |
| A0A804LG03 | Uncharacterized protein                              | 58.155            | 0.413    | 3.53154×10 <sup>-14</sup> | down           |
| A0A804LUU9 | Uncharacterized protein                              | 22.364            | 2.426    | 3.32839×10 <sup>-8</sup>  | up             |
| A0A804MGL2 | Uncharacterized protein                              | 14.571            | 0.24     | 1.56129×10 <sup>-9</sup>  | down           |
| A0A804MXV9 | Uncharacterized protein                              | 40.208            | 18.256   | 0.000108459               | up             |

|            |                                              |        |        |                           |      |
|------------|----------------------------------------------|--------|--------|---------------------------|------|
| A0A804N5U7 | Uncharacterized protein                      | 39.666 | 0.482  | $1.95009 \times 10^{-7}$  | down |
| A0A804NWX6 | Uncharacterized protein                      | 28.88  | 3.396  | $3.09982 \times 10^{-6}$  | up   |
| A0A804P0S1 | Uncharacterized protein                      | 41.341 | 0.148  | $9.0846 \times 10^{-11}$  | down |
| A0A804P6E1 | Uncharacterized protein                      | 13.366 | 2.275  | $7.75334 \times 10^{-7}$  | up   |
| A0A804PEW7 | Uncharacterized protein                      | 44.627 | 4.918  | 0.009749018               | up   |
| A0A804PRB2 | Uncharacterized protein                      | 34.268 | 4.239  | $1.27434 \times 10^{-9}$  | up   |
| A0A804Q0J2 | Uncharacterized protein                      | 27.573 | 2.109  | $6.30083 \times 10^{-6}$  | up   |
| B6TFF1     | Thioredoxin O1 mitochondrial                 | 19.265 | 0.477  | $3.55645 \times 10^{-6}$  | down |
| A0A804UML8 | Uncharacterized protein                      | 59.746 | 0.291  | $9.65224 \times 10^{-7}$  | down |
| B4F922     | Acyltransferase                              | 47.58  | 0.376  | $7.1074 \times 10^{-6}$   | down |
| B4F9D6     | Hevein-like prepro-protein                   | 15.716 | 5.414  | 0.000340742               | up   |
| B4FB66     | 40S ribosomal protein S5-2                   | 22.196 | 0.481  | $3.02683 \times 10^{-6}$  | down |
| B4FFB8     | 5a2 protein                                  | 12.046 | 0.392  | $5.07644 \times 10^{-9}$  | down |
| B4FFQ0     | Thioredoxin                                  | 13.608 | 0.349  | $9.30389 \times 10^{-6}$  | down |
| B4FHT1     | Annexin                                      | 35.344 | 0.304  | $3.15073 \times 10^{-11}$ | down |
| B4FI88     | 60S acidic ribosomal protein P2-5            | 11.329 | 0.418  | $1.28648 \times 10^{-8}$  | down |
| B4FKP4     | Peroxygenase 2                               | 34.23  | 0.305  | $8.0305 \times 10^{-10}$  | down |
| B4FN23     | Dirigent protein                             | 34.528 | 3.024  | $8.43224 \times 10^{-12}$ | up   |
| B4FPE4     | V-type proton ATPase subunit G               | 12.235 | 2.005  | 0.000361481               | up   |
| B4FQ44     | L-tryptophan--pyruvate aminotransferase 1    | 47.217 | 0.467  | $3.28863 \times 10^{-8}$  | down |
| B4FR99     | Acidic endochitinase                         | 32.535 | 12.451 | $2.47878 \times 10^{-12}$ | up   |
| B4FRA6     | OSJNBb0091E11.19-like protein                | 40.523 | 3.194  | $1.97919 \times 10^{-10}$ | up   |
| B4FRP8     | Plastid-lipid-associated protein 2           | 34.28  | 2.643  | $3.65334 \times 10^{-6}$  | up   |
| B4FSD4     | Acetylglutamate kinase chloroplastic         | 35.422 | 2.132  | $9.37342 \times 10^{-7}$  | up   |
| B4FVP5     | Pathogenesis-related protein4                | 17.224 | 2.352  | $3.4396 \times 10^{-5}$   | up   |
| B4G0F8     | PRA1 family protein                          | 24.271 | 2.019  | 0.00020015                | up   |
| B4G1C2     | GH18 domain-containing protein               | 34.236 | 2.354  | $1.76815 \times 10^{-10}$ | up   |
| B4G1T3     | Chitinase chem5                              | 30.293 | 6.324  | 0.001093716               | up   |
| B6SGF3     | Glyoxalase family protein superfamily        | 15.083 | 0.058  | $7.23914 \times 10^{-16}$ | down |
| B6SH12     | Win1                                         | 16.092 | 2.717  | $1.01676 \times 10^{-6}$  | up   |
| B6SID7     | Late embryogenesis-abundant protein, group 3 | 18.599 | 2.002  | $5.27554 \times 10^{-12}$ | up   |
| B6SII5     | Uncharacterized protein                      | 25.343 | 2.904  | $3.20539 \times 10^{-6}$  | up   |
| B6SN63     | Late embryogenesis-abundant protein 3        | 21.306 | 2.101  | $3.9408 \times 10^{-9}$   | up   |
| B6SZ78     | Cytochrome P450 CYP71W7                      | 57.855 | 2.584  | 0.003784056               | up   |



|        |                                          |        |       |                           |      |
|--------|------------------------------------------|--------|-------|---------------------------|------|
| B6T391 | Lichenase-2                              | 34.973 | 0.439 | $4.32464 \times 10^{-8}$  | down |
| B6TF54 | Chorismate mutase                        | 35.005 | 0.31  | $1.26995 \times 10^{-8}$  | down |
| B6UH04 | Subtilisin-chymotrypsin inhibitor CI-1B  | 7.9792 | 6.17  | $1.89611 \times 10^{-11}$ | up   |
| B6UH67 | Late embryogenesis-abundant protein D-34 | 27.177 | 2.162 | $1.18383 \times 10^{-9}$  | up   |
| B7ZZ42 | Heat shock 70 kDa protein 3              | 71.162 | 0.38  | $4.79722 \times 10^{-10}$ | down |
| C0HGH7 | Universal stress family protein          | 21.162 | 2.183 | 0.001865446               | up   |
| C0P8L5 | Uncharacterized protein                  | 27.093 | 0.138 | $1.515 \times 10^{-8}$    | down |
| C0PAS9 | Alba DNA/RNA-binding protein             | 15.873 | 2.255 | $7.47414 \times 10^{-5}$  | up   |
| C0PIH6 | Aldose 1-epimerase                       | 40.62  | 0.398 | $1.70202 \times 10^{-9}$  | down |
| C4JBA7 | Uncharacterized protein                  | 24.661 | 0.439 | $6.53505 \times 10^{-5}$  | down |
| K7VQ98 | Class I heat shock protein 3             | 15.846 | 2.002 | $3.45108 \times 10^{-7}$  | up   |
| Q8W0V2 | Lipoxygenase                             | 96.489 | 3.412 | $1.26592 \times 10^{-12}$ | up   |

**Table S3.** The list of DEPs in BFL-1/ZH58.

| Accession  | Description                                          | Mol. weight [kDa] | BFL-1/ZH58 | BFL-1/ZH58 PVal           | BFL-1/ZH58 State |
|------------|------------------------------------------------------|-------------------|------------|---------------------------|------------------|
| epsps      | epsps                                                | 47.614            | 23.718     | 0.000121842               | up               |
| Q94IM1     | 22 kDa alpha-zein 14                                 | 28.934            | 3.913      | $8.87292 \times 10^{-10}$ | up               |
| P09233     | Superoxide dismutase [Mn] 3.1, mitochondrial         | 25.545            | 2.115      | 0.000179006               | up               |
| Q6XZ78     | Fructokinase-2                                       | 35.481            | 0.442      | $1.9337 \times 10^{-9}$   | down             |
| Q9FQA3     | Glutathione transferase GST 23                       | 24.878            | 2.075      | $3.42691 \times 10^{-9}$  | up               |
| A0A1D6DXF6 | Eukaryotic translation initiation factor 3 subunit C | 106.06            | 2.105      | $6.242 \times 10^{-9}$    | up               |
| A0A1D6F072 | Indole-3-acetic acid amido synthetase                | 67.209            | 0.245      | $4.80815 \times 10^{-7}$  | down             |
| A0A1D6HTN8 | Xylanase inhibitor protein 1                         | 32.992            | 2.589      | $6.57885 \times 10^{-8}$  | up               |
| A0A1D6HUR0 | Uncharacterized protein                              | 19.01             | 2.679      | 0.001651847               | up               |
| A0A1D6I4V5 | Alanine aminotransferase 2 mitochondrial             | 50.682            | 2.31       | $4.74785 \times 10^{-9}$  | up               |
| A0A1D6IKD3 | Uncharacterized protein                              | 37.52             | 2.106      | $6.02537 \times 10^{-8}$  | up               |
| B6T7W2     | Copper transport protein family                      | 12.726            | 0.418      | $1.60392 \times 10^{-6}$  | down             |
| A0A1D6LA97 | Anthranilate synthase                                | 64.487            | 0.475      | $8.69049 \times 10^{-7}$  | down             |
| A0A1D6N0K3 | Peroxidase                                           | 38.089            | 0.311      | 0.002788432               | down             |
| A0A1D6N323 | Stearoyl-acyl-carrier-protein desaturase 1           | 42.74             | 0.397      | $1.94238 \times 10^{-6}$  | down             |
| A0A1D6NFL0 | Glutamate synthase (NADH)                            | 236.82            | 0.459      | $1.505 \times 10^{-7}$    | down             |
| A0A804LSV9 | Uncharacterized protein                              | 33.111            | 2.194      | $5.12458 \times 10^{-5}$  | up               |
| A0A804M4S4 | Uncharacterized protein                              | 12.923            | 2.687      | 0.02095343                | up               |

|            |                                                       |        |       |                           |      |
|------------|-------------------------------------------------------|--------|-------|---------------------------|------|
| A0A804MXV9 | Uncharacterized protein                               | 40.208 | 5.141 | 0.001977593               | up   |
| A0A804NKN1 | Uncharacterized protein                               | 13.984 | 2.045 | $8.66456 \times 10^{-9}$  | up   |
| A0A804NLI1 | Uncharacterized protein                               | 52.448 | 0.417 | $3.10403 \times 10^{-7}$  | down |
| A0A804QW48 | Uncharacterized protein                               | 51.653 | 0.425 | 0.01349713                | down |
| A0A804UML8 | Uncharacterized protein                               | 59.746 | 0.409 | $1.99729 \times 10^{-7}$  | down |
| B4F922     | Acyltransferase                                       | 47.58  | 0.366 | $2.08369 \times 10^{-8}$  | down |
| B4FFQ0     | Thioredoxin                                           | 13.608 | 0.345 | $3.89812 \times 10^{-9}$  | down |
| B4FNY2     | Translin family protein                               | 32.261 | 0.425 | 0.004111655               | down |
| B4FR99     | Acidic endochitinase                                  | 32.535 | 7.692 | $1.35695 \times 10^{-11}$ | up   |
| B4FRA6     | OSJNBb0091E11.19-like protein                         | 40.523 | 2.357 | $1.90028 \times 10^{-9}$  | up   |
| B4FRP8     | Plastid-lipid-associated protein 2                    | 34.28  | 2.14  | $1.49975 \times 10^{-5}$  | up   |
| B4FSR6     | Glutathione S-transferase                             | 26.491 | 2.03  | 0.003197439               | up   |
| B4G197     | 16.9 kDa class I heat shock protein 1                 | 17.223 | 2.402 | $2.24475 \times 10^{-7}$  | up   |
| B6SMQ5     | Triose phosphate isomerase5                           | 27.339 | 0.489 | $4.5812 \times 10^{-5}$   | down |
| B6T391     | Lichenase-2                                           | 34.973 | 0.475 | $1.06673 \times 10^{-7}$  | down |
| B6TF54     | Chorismate mutase                                     | 35.005 | 0.39  | $9.07098 \times 10^{-9}$  | down |
| B7ZZ42     | Heat shock 70 kDa protein 3                           | 71.162 | 0.35  | $5.68537 \times 10^{-12}$ | down |
| C0P8L5     | Uncharacterized protein                               | 27.093 | 0.471 | $7.49139 \times 10^{-6}$  | down |
| C0PGB5     | Pyruvate kinase                                       | 62.638 | 0.449 | $1.49176 \times 10^{-6}$  | down |
| E1AFV5     | Beta-1,3-glucanase                                    | 35.976 | 2.132 | $4.4876 \times 10^{-10}$  | up   |
| K7VQ65     | Putative translation elongation factor family protein | 93.906 | 0.49  | $5.56232 \times 10^{-7}$  | down |
| Q8W0V2     | Lipoxygenase                                          | 96.489 | 2.04  | $1.02282 \times 10^{-10}$ | up   |

**Table S4.** The list of DEPs in BFL-2/ZH58×CH72.

| Accession  | Description                                   | Mol. weight [kDa] | BFL-2/ZH58×CH72 | BFL-2/ZH58×CH72<br>PVal   | BFL-2/ZH58×CH72<br>State |
|------------|-----------------------------------------------|-------------------|-----------------|---------------------------|--------------------------|
| epsps      | epsps                                         | 47.614            | 16.396          | $1.3585 \times 10^{-7}$   | up                       |
| Cry1F      | Cry1F                                         | 73.876            | 26.586          | 0.004223503               | up                       |
| A5H8G4     | Peroxidase 1                                  | 38.354            | 0.39            | $3.50531 \times 10^{-5}$  | down                     |
| O24581     | Luminal-binding protein 3                     | 73.156            | 0.404           | 0.001158105               | down                     |
| P08031     | 16 kDa gamma-zein                             | 19.558            | 2.036           | 0.000261263               | up                       |
| P11155     | Pyruvate, phosphate dikinase 1, chloroplastic | 102.67            | 2.707           | $3.07029 \times 10^{-5}$  | up                       |
| P24632     | 17.8 kDa class II heat shock protein          | 17.799            | 2.34            | $9.58835 \times 10^{-10}$ | up                       |
| Q41819     | Indole-3-acetate beta-glucosyltransferase     | 49.71             | 2.151           | $9.12371 \times 10^{-7}$  | up                       |
| A0A1D6HTN8 | Xylanase inhibitor protein 1                  | 32.992            | 3.619           | $3.14646 \times 10^{-10}$ | up                       |

|            |                                          |        |       |                           |      |
|------------|------------------------------------------|--------|-------|---------------------------|------|
| A0A1D6L429 | Late embryogenesis-abundant protein 31   | 21.194 | 0.399 | 9.64566×10 <sup>-6</sup>  | down |
| A0A1D6M439 | Pyruvate, phosphate dikinase             | 83.419 | 2.597 | 8.36256×10 <sup>-10</sup> | up   |
| A0A804MXV9 | Uncharacterized protein                  | 40.208 | 4.111 | 0.022128596               | up   |
| A0A804QA55 | Uncharacterized protein                  | 43.647 | 0.402 | 6.33373×10 <sup>-8</sup>  | down |
| B4F976     | 17.4 kDa class I heat shock protein      | 17.88  | 2.713 | 9.0913×10 <sup>-6</sup>   | up   |
| B4F9D6     | Hevein-like prepro-protein               | 15.716 | 2.669 | 1.64697×10 <sup>-10</sup> | up   |
| B4FR99     | Acidic endochitinase                     | 32.535 | 2.592 | 9.81667×10 <sup>-8</sup>  | up   |
| B4FUN3     | GST N-terminal domain-containing protein | 27.324 | 3.458 | 2.68607×10 <sup>-5</sup>  | up   |
| B4FVP5     | Pathogenesis-related protein4            | 17.224 | 2.291 | 1.20073×10 <sup>-6</sup>  | up   |
| B4G0F8     | PRA1 family protein                      | 24.271 | 2.108 | 2.1691×10 <sup>-5</sup>   | up   |
| B4G1T3     | Chitinase chem5                          | 30.293 | 3.906 | 5.61178×10 <sup>-7</sup>  | up   |
| B6T522     | 40S ribosomal protein S14                | 16.359 | 2.109 | 0.019758588               | up   |
| C0PAJ0     | ADP-ribosylation factor A1F              | 20.627 | 2.147 | 0.000263885               | up   |
| C4JBA7     | Uncharacterized protein                  | 24.661 | 0.485 | 0.000770984               | down |
| K7UCZ5     | Heat shock 70 kDa protein 6 chloroplast  | 74.67  | 2.016 | 0.000350693               | up   |
| K7WCU4     | Uncharacterized protein                  | 14.081 | 0.498 | 3.03405×10 <sup>-6</sup>  | down |

**Table S5.** The list of DAMs in ZH58/BBL.

| Index      | Compounds                                                        | VIP  | Fold_Change           | Type |
|------------|------------------------------------------------------------------|------|-----------------------|------|
| pmp000235  | Salcolin B*                                                      | 1.36 | 2.12×10 <sup>-1</sup> | down |
| pmb0501    | Agmatine                                                         | 1.34 | 3.05                  | up   |
| mws4085    | Sinapic acid                                                     | 1.29 | 4.48×10 <sup>-1</sup> | down |
| Lmyn004037 | Eriodictyol-7-O-(6"-O-galloyl)glucoside                          | 1.34 | 4.79                  | up   |
| mws0983    | N-Oleoylethanolamine                                             | 1.37 | 2.59                  | up   |
| Hmbp006861 | 1,2-O-Diferuloylglycerol*                                        | 1.36 | 4.60                  | up   |
| pmp000091  | 1,3-O-Diferuloylglycerol*                                        | 1.36 | 4.60                  | up   |
| pme1014    | Menatetrenone (Vitamin K2)                                       | 1.39 | 1.72×10 <sup>4</sup>  | up   |
| HJN092     | p-Coumaroylferuloylputrescine                                    | 1.36 | 2.54                  | up   |
| MWSmce083  | Ferulic acid methyl ester                                        | 1.26 | 4.89×10 <sup>-1</sup> | down |
| mws0918    | Prunetin (5,4'-Dihydroxy-7-methoxyisoflavone)                    | 1.03 | 3.65×10 <sup>-1</sup> | down |
| pmn001690  | 3-Hydroxy-4-isopropylbenzylalcohol-3-O-glucoside                 | 1.32 | 4.05                  | up   |
| Lmhp009190 | 2-Linoleoylglycerol-1,3-di-O-glucoside*                          | 1.33 | 2.29                  | up   |
| Zmdp000292 | Arginine methyl ester                                            | 1.33 | 2.12                  | up   |
| Lmbn004685 | 5S,8R-DiHODE; (5S,8R,9Z,12Z)-5,8-Dihydroxyoctadeca-9,12-dienoate | 1.14 | 4.01×10 <sup>-1</sup> | down |
| Lmbn007891 | Hydroxy ricinoleic acid                                          | 1.39 | 2.63                  | up   |
| pmb3042    | Tricin-5-O-Glucoside                                             | 1.36 | 4.70×10 <sup>-1</sup> | down |
| pme1109    | Guanine*                                                         | 1.31 | 2.17                  | up   |
| Lmlp001118 | 3'-Glucosyl-6,7-dihydroxy-N-methyl-benzyltetrahydroisoquinoline  | 1.26 | 2.37                  | up   |
| Lmyn006011 | Gingerglycolipid B*                                              | 1.37 | 2.22                  | up   |
| mws0126    | LysoPC 18:0*                                                     | 1.39 | 2.01                  | up   |
| Hmqp006023 | Ethyl 9-Hydroxy-10,12-octadecadienoic acid                       | 1.36 | 2.61                  | up   |

|            |                                                             |      |                       |      |
|------------|-------------------------------------------------------------|------|-----------------------|------|
| Hmcp002187 | Limocitrin-3-O-galactoside                                  | 1.06 | $4.21 \times 10^{-1}$ | down |
| pme2914    | 3-Hydroxy-3-methylpentane-1,5-dioic acid                    | 1.31 | $4.70 \times 10^{-1}$ | down |
| pmb3142    | Salicylic acid-2-O-glucoside                                | 1.30 | 4.62                  | up   |
| pme1841    | Cadaverine                                                  | 1.22 | $4.40 \times 10^{-1}$ | down |
| MWSmce415  | Cirsimaritin (4',5-dihydroxy-6,7-dimethoxyflavone)*         | 1.34 | $2.30 \times 10^{-1}$ | down |
| Hmcn003273 | Reynosin                                                    | 1.36 | $3.30 \times 10^{-1}$ | down |
| Xmyn008071 | Gnetifolin B                                                | 1.29 | $4.14 \times 10^{-1}$ | down |
| pme2776    | 2'-Deoxyinosine                                             | 1.37 | $2.07 \times 10^{-1}$ | down |
| pme0021    | L-Phenylalanine                                             | 1.33 | 2.39                  | up   |
| Lmlp003161 | N-Feruloylputrescine                                        | 1.38 | 9.21                  | up   |
| pmn001694  | 9,10,13-Trihydroxy-11-Octadecenoic Acid                     | 1.38 | 2.17                  | up   |
| pme1178    | Guanosine                                                   | 1.30 | 2.20                  | up   |
| pmn001689  | 9-Hydroxy-12-oxo-15(Z)-octadecenoic acid                    | 1.39 | 2.53                  | up   |
| pmp000234  | Salcolin A*                                                 | 1.38 | $2.49 \times 10^{-1}$ | down |
| pme3011    | $\gamma$ -Aminobutyric acid                                 | 1.31 | $4.30 \times 10^{-1}$ | down |
| pmb0746    | Tricin-4'-O-(guaiacylglycerol)ether                         | 1.39 | $2.06 \times 10^{-1}$ | down |
| pme3967    | 2-(Dimethylamino)guanosine                                  | 1.33 | 4.94                  | up   |
| Zmjp000182 | N-Monomethyl-L-arginine                                     | 1.34 | 2.21                  | up   |
| pme0026    | L-Lysine                                                    | 1.32 | 7.02                  | up   |
| pmb0296    | 1-Oleoyl-Sn-Glycerol                                        | 1.38 | 2.62                  | up   |
| Hmhp005160 | Rehderianin I                                               | 1.39 | $6.73 \times 10^{-2}$ | down |
| Lmyn005812 | Gingerglycolipid A*                                         | 1.36 | 2.01                  | up   |
| pmn001319  | 1-O-Feruloyl-3-O-p-Coumaroylglycerol                        | 1.34 | 4.82                  | up   |
| Lmyn006221 | Gingerglycolipid C                                          | 1.38 | 2.59                  | up   |
| pme3337    | Succinyladenosine                                           | 1.35 | 3.08                  | up   |
| Jmzn006005 | 3,4-Methylenedioxy cinnamyl alcohol                         | 1.14 | $4.72 \times 10^{-1}$ | down |
| Zmyn000155 | N- $\alpha$ -Acetyl-L-ornithine                             | 1.31 | 2.31                  | up   |
| Hmxp007521 | 3',4'-Dihydroxy-7,5'-dimethoxyflavone*                      | 1.37 | $2.29 \times 10^{-1}$ | down |
| Hmqn003054 | 9,10,11-Trihydroxy-12-octadecenoic acid                     | 1.37 | 2.22                  | up   |
| mws1200    | Trans-4-Hydroxycinnamic Acid Methyl Ester                   | 1.15 | $3.44 \times 10^{-1}$ | down |
| Lmbn004240 | 9,10-Dihydroxy-12,13-epoxyoctadecanoic acid                 | 1.37 | 2.02                  | up   |
| MWSmce548  | Betaine                                                     | 1.34 | $3.66 \times 10^{-1}$ | down |
| Lmhp009384 | 1-Linoleoylglycerol-2,3-di-O-glucoside*                     | 1.38 | 2.20                  | up   |
| Qmqp101713 | Loliolide*                                                  | 1.22 | 2.34                  | up   |
| pme3033    | N,N-Dimethylglycine                                         | 1.34 | $4.67 \times 10^{-1}$ | down |
| Lmhp009890 | LysoPC 20:3                                                 | 1.38 | 5.00                  | up   |
| MWS1882    | Iminodiacetic acid                                          | 1.34 | 2.91                  | up   |
| Lmcp002302 | N6-(2-Hydroxyethyl)adenosine                                | 1.33 | 5.32                  | up   |
| pmb0745    | Tricin-4'-O-syringyl alcohol                                | 1.35 | $1.74 \times 10^{-1}$ | down |
| pmc0274    | 6-Methylmercaptopurine                                      | 1.31 | 2.51                  | up   |
| Zmzp006857 | Tricin-4'-O-[ $\beta$ -guaiacyl-(9"-O-acetyl)glycerol]ether | 1.37 | $9.29 \times 10^{-2}$ | down |
| pme3961    | 2'-Deoxyadenosine                                           | 1.37 | $2.93 \times 10^{-1}$ | down |
| Zmhp004065 | 7,8-Dihydroxy-5,6,4'-trimethoxyflavone*                     | 1.27 | $2.11 \times 10^{-1}$ | down |
| MWSmce609  | L-Aspartic acid                                             | 1.34 | 2.20                  | up   |
| pme0243    | Glutaric acid                                               | 1.38 | $1.94 \times 10^{-1}$ | down |
| mws0639    | 2,3-Dihydroxybenzoic Acid*                                  | 1.36 | $4.95 \times 10^{-1}$ | down |
| MWSmce295  | 1-beta-D-Arabinofuranosyluracil                             | 1.34 | 2.20                  | up   |
| pmb0716    | Tricin-4'-O-glucoside-7-O-glucoside*                        | 1.33 | $2.56 \times 10^{-1}$ | down |
| Lmjp004941 | 3,5,4'-Trihydroxy-7-methoxyflavone (Rhamnocitrin)           | 1.29 | $4.20 \times 10^{-1}$ | down |
| mws1401    | L-Theanine                                                  | 1.33 | $3.11 \times 10^{-1}$ | down |
| Zmhn001446 | Syringaresinol-4'-O-glucoside                               | 1.23 | $8.86 \times 10$      | up   |
| pmn001610  | Eicosadienoic acid                                          | 1.00 | 3.29                  | up   |
| Jmcp010061 | Costic acid                                                 | 1.35 | $3.32 \times 10^{-1}$ | down |
| Zmhn002301 | p-Coumaric acid-4-O-glucoside                               | 1.28 | 3.02                  | up   |
| pme3388    | Homoarginine                                                | 1.35 | 2.23                  | up   |
| Lmgn000160 | 3-Ureidopropionic Acid                                      | 1.28 | 2.17                  | up   |
| mws0001    | L-Asparagine                                                | 1.29 | 2.12                  | up   |
| mws0133    | Nicotinamide                                                | 1.38 | 2.95                  | up   |

|            |                                                                            |      |                       |      |
|------------|----------------------------------------------------------------------------|------|-----------------------|------|
| Zmhp003514 | 6,7,8-Tetrahydroxy-5-methoxyflavone                                        | 1.24 | $2.81 \times 10^{-1}$ | down |
| MWSslk174  | 2,4'-Dihydroxybenzophenone                                                 | 1.33 | $3.29 \times 10^{-1}$ | down |
| pme0193    | L-Glutamine                                                                | 1.35 | 4.61                  | up   |
| pmb0962    | L-Lysine-Butanoic Acid                                                     | 1.34 | $1.50 \times 10^{-1}$ | down |
| MWSHY0069  | Hispidulin (5,7,4'-Trihydroxy-6-methoxyflavone)                            | 1.33 | $3.33 \times 10^{-1}$ | down |
| Lmyp001747 | 2-O-Glucosyl-7-hydroxy-1,4(2H)-benzoxazin-3-one (DHBOA glucoside)          | 1.14 | 2.37                  | up   |
| pmb0490    | p-Coumaroylputrescine                                                      | 1.39 | 6.77                  | up   |
| MWSslk060  | Eupatilin (5,7-Dihydroxy-3',4',6-Trimethoxyflavone)                        | 1.31 | $2.30 \times 10^{-1}$ | down |
| Lmsn009824 | 2 $\alpha$ ,3 $\beta$ ,19 $\alpha$ ,23-Tetrahydroxyolean-12-en-28-oic acid | 1.38 | $2.36 \times 10^{-1}$ | down |
| Hmhp005846 | Tenaxin I                                                                  | 1.33 | $1.99 \times 10^{-1}$ | down |
| Zmzp004503 | Tricin-5,7-O-diglucoside*                                                  | 1.14 | $4.78 \times 10^{-1}$ | down |
| mws0183    | 3,4-Dihydroxybenzoic acid (Protocatechuic acid)*                           | 1.36 | $4.71 \times 10^{-1}$ | down |
| MWSmce577  | (E)-Ethyl p-methoxycinnamate                                               | 1.39 | $1.56 \times 10^3$    | up   |
| Lmhp008513 | 2- $\alpha$ -Linolenoyl-glycerol-1,3-di-O-glucoside*                       | 1.22 | 2.18                  | up   |
| Zmyn005209 | 12-Methyltetradecanoic Acid*                                               | 1.39 | $4.16 \times 10^{-5}$ | down |
| mws0182    | 4-Hydroxyphenylacetic acid                                                 | 1.21 | 2.30                  | up   |
| mws0129    | Genkwanin (Apigenin 7-methyl ether)                                        | 1.05 | $3.80 \times 10^{-1}$ | down |
| mws0473    | 2-Methylsuccinic acid                                                      | 1.36 | $1.84 \times 10^{-1}$ | down |
| Lmmn000806 | Dimethylmalonic acid                                                       | 1.36 | $1.84 \times 10^{-1}$ | down |
| Lmmn002164 | Monomethyl succinate                                                       | 1.36 | $1.84 \times 10^{-1}$ | down |
| Jmcp009989 | Pterodonic acid                                                            | 1.36 | $3.26 \times 10^{-1}$ | down |
| Lmzp004885 | Tricin (5,7,4'-Trihydroxy-3',5'-dimethoxyflavone)                          | 1.39 | $7.14 \times 10^{-2}$ | down |
| Lmgp004539 | 5,7,4'-Trihydroxy-6,8-dimethoxyisoflavone-7-O-galactoside-glucoside        | 1.29 | $4.50 \times 10^{-1}$ | down |
| pme3034    | Ethylmalonic acid                                                          | 1.37 | $2.05 \times 10^{-1}$ | down |
| pme1173    | Allopurinol                                                                | 1.33 | 3.04                  | up   |
| Smpn009074 | 2 $\alpha$ ,3 $\alpha$ ,19 $\alpha$ ,23-tetrahydroxy-12-ursen-28-oic acid  | 1.39 | $4.90 \times 10^{-4}$ | down |
| zjzp121501 | Eupatorinol                                                                | 1.34 | $3.51 \times 10^{-1}$ | down |
| pmb3053    | Tricin-4'-O-eudesmic acid                                                  | 1.38 | $1.59 \times 10^{-1}$ | down |
| Zmjp004852 | 5,6,3',4'-Tetrahydroxy-3,7-dimethoxyflavone-6-O-glucoside                  | 1.24 | $2.56 \times 10^{-1}$ | down |
| Hmtp000776 | 4,5,6-Trihydroxy-2-cyclohexen-1-ylideneacetonitrile                        | 1.23 | 2.02                  | up   |
| pmb2795    | 4-Methoxycinnamic acid                                                     | 1.17 | $3.32 \times 10^{-1}$ | down |
| pme2527    | L-Ornithine                                                                | 1.33 | 2.02                  | up   |
| mws1195    | p-Coumaric acid methyl ester                                               | 1.39 | $4.07 \times 10^{-4}$ | down |
| mws1038    | Pantetheine                                                                | 1.20 | 2.01                  | up   |
| pme2693    | N-Acetylputrescine                                                         | 1.21 | 3.11                  | up   |
| Hmbn002692 | 6'-O-Feruloyl-D-sucrose                                                    | 1.30 | $3.99 \times 10^{-1}$ | down |
| Lmhp008744 | 1- $\alpha$ -Linolenoyl-glycerol-2,3-di-O-glucoside*                       | 1.30 | 2.75                  | up   |
| MWSmce613  | Citicoline                                                                 | 1.22 | 2.07                  | up   |
| MWS5209    | N-Methyl- $\alpha$ -aminoisobutyric acid                                   | 1.29 | $1.56 \times 10^{-1}$ | down |
| pmb0496    | N-Feruloylagmatine                                                         | 1.38 | 4.88                  | up   |
| Wmhp000055 | 2,5-Dimethoxybenzoquinone                                                  | 1.26 | 2.55                  | up   |
| mws0520    | N-Acetyl-L-tyrosine                                                        | 1.26 | $2.58 \times 10^{-1}$ | down |
| MWSHY0009  | Diosmetin (5,7,3'-Trihydroxy-4'-methoxyflavone)                            | 1.24 | $3.63 \times 10^{-1}$ | down |
| Zmdp001647 | $\gamma$ -Glutamyl-L-valine                                                | 1.15 | 2.16                  | up   |
| pma0633    | N-p-Coumaroylspermine                                                      | 1.29 | $4.10 \times 10^{-1}$ | down |
| mws0248    | Uridine                                                                    | 1.12 | 2.41                  | up   |
| Zmzp000145 | Trimethyllysine                                                            | 1.17 | 2.62                  | up   |
| MWSmce498  | Apigenin-7-O-neohesperidoside (Rhoifolin)*                                 | 1.19 | 2.86                  | up   |
| Zmsp000366 | Fagomine                                                                   | 1.12 | 2.03                  | up   |
| mws0005    | Tryptamine                                                                 | 1.34 | 3.55                  | up   |
| pmb2857    | L-Glutamic acid-O-glycoside                                                | 1.05 | 2.07                  | up   |
| Lmmn002179 | Methyl salicylate-2-O-glucoside                                            | 1.35 | $1.51 \times 10$      | up   |
| Lmmp002013 | Dihydroferuloylputrescine                                                  | 1.38 | $1.11 \times 10$      | up   |
| pmp000548  | Pratensein                                                                 | 1.27 | $3.66 \times 10^{-1}$ | down |
| HJAP035    | 1-(4-Methoxyphenyl)allyl acetate                                           | 1.31 | 3.00                  | up   |
| pmb2620    | 3,4-Dimethoxycinnamic acid                                                 | 1.13 | $4.79 \times 10^{-1}$ | down |

|            |                                                      |      |                       |      |
|------------|------------------------------------------------------|------|-----------------------|------|
| Lmlp002205 | Isololiolide*                                        | 1.18 | 2.22                  | up   |
| mws1060    | 9-(Arabinosyl)hypoxanthine                           | 1.29 | 3.30                  | up   |
| Zmhn003257 | 5,7,2'-Trihydroxy-8-methoxyflavone                   | 1.20 | $4.54 \times 10^{-1}$ | down |
| pme0368    | Apigenin-7-O-rutinoside (Isorhoifolin)*              | 1.33 | 2.36                  | up   |
| pmn001419  | 1-O-p-Coumaroyl- $\beta$ -D-glucose                  | 1.27 | 2.70                  | up   |
| mws0856    | Quercetin-4'-O-glucoside (Spiraeoside)               | 1.03 | $4.45 \times 10$      | up   |
| pmb3031    | Tricin-4'-O-glycerol                                 | 1.16 | $6.14 \times 10^{-2}$ | down |
| Lmpp003930 | Apigenin-7-O-(6''-p-Coumaryl)glucoside               | 1.16 | 2.03                  | up   |
| Hmgs002564 | Tricin-7-O-glucuronide(2 $\rightarrow$ 1)glucuronide | 1.37 | $2.48 \times 10^{-1}$ | down |

**Table S6.** The list of DAMs in ZH58/BFL-1.

| Index      | Compounds                                           | VIP  | Fold Change           | Type |
|------------|-----------------------------------------------------|------|-----------------------|------|
| Lmhp112042 | 1-Linoleoylglycerol*                                | 1.38 | 2.43                  | up   |
| Lmyn002540 | Dioxindole-3-acetyl-3-O-glucoside                   | 1.38 | 2.50                  | up   |
| pmb0501    | Agmatine                                            | 1.37 | 5.09                  | up   |
| Zmyn004732 | 2R-hydroxy-9Z,12Z,15Z-octadecatrienoic acid         | 1.39 | 2.16                  | up   |
| mws0275    | L-Malic acid                                        | 1.39 | 4.74                  | up   |
| Zmdp000376 | 4-Guanidinobutanal                                  | 1.33 | 2.93                  | up   |
| Lmyn004037 | Eriodictyol-7-O-(6''-O-galloyl)glucoside            | 1.35 | 2.62                  | up   |
| mws0983    | N-Oleoyl ethanolamine                               | 1.37 | 2.95                  | up   |
| Zmyn004449 | 9-Hydroxy-12-oxo-10(E),15(Z)-octadecadienoic acid   | 1.39 | 2.34                  | up   |
| mws0192    | Succinic acid                                       | 1.33 | 2.15                  | up   |
| Lmbn000198 | 3-Dehydro-L-Threonic Acid                           | 1.37 | 4.18                  | up   |
| mws0281    | Citric Acid*                                        | 1.38 | 3.95                  | up   |
| Lmhp011388 | 2- $\alpha$ -Linolenoyl-glycerol*                   | 1.39 | 3.09                  | up   |
| mws0216    | Trans-4-Hydroxy-L-proline*                          | 1.36 | 2.18                  | up   |
| pmf0348    | 2,6-Dimethyl-7-octene-2,3,6-triol                   | 1.38 | 2.28                  | up   |
| Lmhp008833 | LysoPC 16:1(2n isomer)*                             | 1.05 | 2.95                  | up   |
| mws0277    | Quinic Acid                                         | 1.37 | 2.38                  | up   |
| pmn001320  | 1-O-p-Coumaroylglycerol                             | 1.35 | 2.36                  | up   |
| Lmbn003524 | 9-Oxononanoic acid                                  | 1.30 | 2.01                  | up   |
| Zmyn004676 | 17-Hydroxylinolenic acid                            | 1.33 | 2.61                  | up   |
| Ymjm000140 | 3-O-Caffeoylquinic acid methyl ester                | 1.26 | 2.64                  | up   |
| Lmhp009190 | 2-Linoleoylglycerol-1,3-di-O-glucoside*             | 1.32 | 2.50                  | up   |
| Zmpn003368 | 13S-Hydroxy-9Z,11E,15Z-octadecatrienoic acid        | 1.38 | 2.20                  | up   |
| Zmgn000503 | 2,3-Dihydroxy-3-Methylbutanoic Acid                 | 1.36 | 3.12                  | up   |
| pmb2787    | 9-Oxo-10E,12Z-octadecadienoic acid                  | 1.38 | 2.14                  | up   |
| pme1474    | 5'-Deoxy-5'-(methylthio)adenosine                   | 1.34 | 3.93                  | up   |
| mws0237    | Azelaic acid                                        | 1.38 | 2.33                  | up   |
| Lmhp011562 | 1- $\alpha$ -Linolenoyl-glycerol*                   | 1.39 | 2.94                  | up   |
| Lmbn007891 | Hydroxy ricinoleic acid                             | 1.39 | 3.32                  | up   |
| pme0183    | Isoguanine*                                         | 1.35 | 2.34                  | up   |
| pme1109    | Guanine*                                            | 1.31 | 2.79                  | up   |
| Lmhp005784 | p-Coumaroylferuloylcadaverine                       | 1.36 | $3.75 \times 10^{-1}$ | down |
| Lmyn006011 | Gingerglycolipid B*                                 | 1.39 | 2.87                  | up   |
| Hmqp006023 | Ethyl 9-Hydroxy-10,12-octadecadienoic acid          | 1.37 | 3.03                  | up   |
| pme2914    | 3-Hydroxy-3-methylpentane-1,5-dioic acid            | 1.20 | 9.73                  | up   |
| pmb3142    | Salicylic acid-2-O-glucoside                        | 1.32 | 2.07                  | up   |
| MWSmce415  | Cirsimaritin (4',5-dihydroxy-6,7-dimethoxyflavone)* | 1.19 | 2.02                  | up   |
| Hmcn003273 | Reynosin                                            | 1.34 | 2.33                  | up   |
| mws0147    | $\beta$ -Hydroxyisovaleric acid                     | 1.26 | 2.48                  | up   |
| pme0274    | 6-Aminocaproic acid                                 | 1.32 | 2.48                  | up   |
| pme0021    | L-Phenylalanine                                     | 1.36 | 3.44                  | up   |
| Lmlp003161 | N-Feruloylputrescine                                | 1.38 | $1.31 \times 10$      | up   |
| pmn001694  | 9,10,13-Trihydroxy-11-Octadecenoic Acid             | 1.39 | 2.23                  | up   |
| pmp001287  | N-Benzylmethylene isomethylamine                    | 1.29 | 2.77                  | up   |
| pme1178    | Guanosine                                           | 1.35 | 3.47                  | up   |
| Zmtn001624 | N-Acetyl isatin                                     | 1.37 | 3.17                  | up   |

|            |                                                   |      |                       |      |
|------------|---------------------------------------------------|------|-----------------------|------|
| pmb2228    | LysoPC 19:0                                       | 1.37 | 2.26                  | up   |
| pmn001689  | 9-Hydroxy-12-oxo-15(Z)-octadecenoic acid          | 1.39 | 4.07                  | up   |
| pmn001658  | Cinnzeylanine                                     | 1.38 | 3.66                  | up   |
| HJN003     | 1-O-Sinapoyl-β-D-glucose                          | 1.03 | 4.62                  | up   |
| pmp001267  | 2-(Dodecylamino)-3-phenyl-1-propanol              | 1.21 | 2.01                  | up   |
| pme3967    | 2-(Dimethylamino)guanosine                        | 1.36 | 5.98                  | up   |
| pmf0297    | 1-Eicosanol                                       | 1.38 | 2.08                  | up   |
| Lmsn015919 | Phytic acid                                       | 1.17 | 4.98                  | up   |
| pme0026    | L-Lysine                                          | 1.31 | 5.31                  | up   |
| pmb0296    | 1-Oleoyl-Sn-Glycerol                              | 1.39 | 3.79                  | up   |
| Hmhp005160 | Rehderianin I                                     | 1.37 | $3.09 \times 10^{-1}$ | down |
| Lmgp004474 | Genistein-7-O-galactoside-rhamnose                | 1.23 | 2.05                  | up   |
| Lmyn005812 | Gingerglycolipid A*                               | 1.39 | 3.72                  | up   |
| pmn001319  | 1-O-Feruloyl-3-O-p-Coumaroylglycerol              | 1.25 | 2.02                  | up   |
| Lmyn006221 | Gingerglycolipid C                                | 1.39 | 3.76                  | up   |
| Cmhp005227 | 4,8-Dihydroxy Naphthol-1-O-glucoside              | 1.01 | 4.03                  | up   |
| pme3337    | Succinyladenosine                                 | 1.35 | 3.05                  | up   |
| pmb0736    | Tricin-7-O-Glucoside*                             | 1.22 | 2.25                  | up   |
| Hmxp007521 | 3',4'-Dihydroxy-7,5'-dimethoxyflavone*            | 1.30 | 2.04                  | up   |
| Hmqn003054 | 9,10,11-Trihydroxy-12-octadecenoic acid           | 1.38 | 2.39                  | up   |
| Lmbn004240 | 9,10-Dihydroxy-12,13-epoxyoctadecanoic acid       | 1.36 | 2.04                  | up   |
| Lmhp009384 | 1-Linoleoylglycerol-2,3-di-O-glucoside*           | 1.39 | 2.64                  | up   |
| pmb0801    | 4-Pyridoxic acid-O-glucoside                      | 1.38 | $3.69 \times 10^{-1}$ | down |
| Lmbp002309 | Sinapaldehyde-4-O-Glucoside                       | 1.33 | 2.33                  | up   |
| MWSmce632  | Vanillin acetate                                  | 1.38 | 2.00                  | up   |
| pmb0782    | Piperidine                                        | 1.32 | 2.86                  | up   |
| Lmhp009890 | LysoPC 20:3                                       | 1.39 | 4.84                  | up   |
| Lmxp000939 | Zarzissine                                        | 1.33 | 2.31                  | up   |
| MWS1882    | Iminodiacetic acid                                | 1.36 | 2.36                  | up   |
| pmb1912    | 10-Formyltetrahydrofolic Acid                     | 1.10 | 2.13                  | up   |
| MWS2984    | 8-Azaguanine                                      | 1.22 | 2.16                  | up   |
| Lmcp002302 | N6-(2-Hydroxyethyl)adenosine                      | 1.36 | 7.20                  | up   |
| MWSmce607  | DL-Threonine                                      | 1.32 | 2.07                  | up   |
| MWSHY0141  | 7-Hydroxy-4-chromone                              | 1.24 | 2.29                  | up   |
| pmb2786    | 9-Hydroxy-10,12,15-octadecatrienoic acid          | 1.33 | 2.04                  | up   |
| pmc0274    | 6-Methylmercaptopurine                            | 1.35 | 3.45                  | up   |
| MWS0205    | Allantoin                                         | 1.30 | 3.69                  | up   |
| pme0500    | D-Melezitose                                      | 1.25 | $3.74 \times 10^{-1}$ | down |
| Hmbp003234 | 1-O-Caffeoylglycerol                              | 1.32 | 2.16                  | up   |
| Zmhp004065 | 7,8-Dihydroxy-5,6,4'-trimethoxyflavone*           | 1.39 | $3.99 \times 10^2$    | up   |
| Rfmb320    | 1-Methylpiperidine-2-carboxylic acid              | 1.36 | 2.16                  | up   |
| pme0243    | Glutaric acid                                     | 1.39 | 3.75                  | up   |
| pme0122    | N6-Acetyl-L-lysine                                | 1.37 | 3.41                  | up   |
| Zmzn000113 | L-threo-3-Methylaspartate                         | 1.31 | 2.05                  | up   |
| MWSmce295  | 1-beta-D-Arabino-furanosyluracil                  | 1.29 | 2.27                  | up   |
| pme0040    | Adenine                                           | 1.27 | 2.25                  | up   |
| mws1401    | L-Theanine                                        | 1.29 | 3.31                  | up   |
| pme0278    | 2,6-Diaminooimelic acid                           | 1.36 | 4.57                  | up   |
| Zmhn001446 | Syringaresinol-4'-O-glucoside                     | 1.23 | $8.08 \times 10$      | up   |
| pma2172    | Cinnamoyltyramine                                 | 1.28 | $3.95 \times 10^{-1}$ | down |
| Jmcp010061 | Costic acid                                       | 1.29 | $4.34 \times 10^{-1}$ | down |
| pme3388    | Homoarginine                                      | 1.28 | 2.09                  | up   |
| Lmqn008975 | PA(18:2/0:0)                                      | 1.08 | 6.43                  | up   |
| mws0668    | Xanthosine                                        | 1.30 | 2.08                  | up   |
| mws0866    | D-Glucose 6-phosphate*                            | 1.07 | 7.09                  | up   |
| mws0133    | Nicotinamide                                      | 1.38 | 5.22                  | up   |
| pme3968    | 7-Methylguanine*                                  | 1.22 | 2.60                  | up   |
| pmb1312    | Tricin-4'-O-(guaiacylglycerol)ether-7-O-glucoside | 1.27 | 3.27                  | up   |
| Cmbn007148 | 1-O-Feruloyl-3-O-caffeoylglycerol                 | 1.33 | 4.20                  | up   |

|            |                                                                            |      |                       |      |
|------------|----------------------------------------------------------------------------|------|-----------------------|------|
| pme0193    | L-Glutamine                                                                | 1.34 | 3.46                  | up   |
| Zmyn000453 | Isocitric Acid*                                                            | 1.35 | 2.55                  | up   |
| pme2773    | L-Cystathionine                                                            | 1.16 | 3.49                  | up   |
| pmb0490    | p-Coumaroylputrescine                                                      | 1.38 | 6.75                  | up   |
| Jmbn003691 | 3,4-dihydroxy-allylbenzene-3-O- $\beta$ -D-glucopyranoside                 | 1.35 | 2.19                  | up   |
| Hmhp001812 | 2'-O-Methyladenosine                                                       | 1.32 | 2.83                  | up   |
| Hmcp000405 | Dihydroisopelletierine                                                     | 1.20 | 1.06 $\times 10$      | up   |
| MWSslk060  | Eupatilin (5,7-Dihydroxy-3',4',6-Trimethoxyflavone)                        | 1.00 | 3.67                  | up   |
| Lmsn009824 | 2 $\alpha$ ,3 $\beta$ ,19 $\alpha$ ,23-Tetrahydroxyolean-12-en-28-oic acid | 1.31 | 3.82 $\times 10^{-1}$ | down |
| MWSmce333  | Crotonoside; 2-Hydroxyadenosine                                            | 1.37 | 2.44                  | up   |
| Zmpn000638 | 3-Guanidinopropionic acid                                                  | 1.20 | 2.69                  | up   |
| Lmhp008513 | 2- $\alpha$ -Linolenoyl-glycerol-1,3-di-O-glucoside*                       | 1.33 | 3.30                  | up   |
| mws0671    | L-Homoserine                                                               | 1.32 | 2.02                  | up   |
| mws0258    | L-Isoleucine*                                                              | 1.35 | 2.17                  | up   |
| mws0473    | 2-Methylsuccinic acid                                                      | 1.34 | 3.94                  | up   |
| Lmmn000806 | Dimethylmalonic acid                                                       | 1.34 | 3.94                  | up   |
| Lmmn002164 | Monomethyl succinate                                                       | 1.34 | 3.94                  | up   |
| Lmhp002031 | L-Leucyl-L-Leucine                                                         | 1.05 | 2.38                  | up   |
| Jmcp009989 | Pterodonic acid                                                            | 1.36 | 4.47 $\times 10^{-1}$ | down |
| MWS2442    | D-Fructose 6-Phosphate*                                                    | 1.02 | 3.87                  | up   |
| pmn001380  | Eucommiol                                                                  | 1.37 | 2.40                  | up   |
| Lmzp004885 | Tricin (5,7,4'-Trihydroxy-3',5'-dimethoxyflavone)                          | 1.36 | 3.47 $\times 10^{-1}$ | down |
| Xmzp009846 | $\alpha$ -Ergocryptine                                                     | 1.13 | 1.02 $\times 10$      | up   |
| Lmgp004539 | 5,7,4'-Trihydroxy-6,8-dimethoxyisoflavone-7-O-galactoside-glucoside        | 1.19 | 2.13                  | up   |
| pme3034    | Ethylmalonic acid                                                          | 1.32 | 2.77                  | up   |
| pme1173    | Allopurinol                                                                | 1.34 | 3.12                  | up   |
| Smpn009074 | 2 $\alpha$ ,3 $\alpha$ ,19 $\alpha$ ,23-tetrahydroxy-12-ursen-28-oic acid  | 1.40 | 7.64 $\times 10^{-4}$ | down |
| pme0010    | L-Serine                                                                   | 1.36 | 2.54                  | up   |
| pme2433    | Diethanolamine                                                             | 1.36 | 2.51                  | up   |
| zjzp121501 | Eupatorinol                                                                | 1.28 | 2.44                  | up   |
| pmb0891    | Cis-Zeatin-7-N-glucoside*                                                  | 1.28 | 4.90 $\times 10^{-1}$ | down |
| Zmjp004852 | 5,6,3',4'-Tetrahydroxy-3,7-dimethoxyflavone-6-O-glucoside                  | 1.04 | 4.74 $\times 10^{-1}$ | down |
| Hmtp000776 | 4,5,6-Trihydroxy-2-cyclohexen-1-ylideneacetonitrile                        | 1.31 | 3.65                  | up   |
| pme2693    | N-Acetylputrescine                                                         | 1.31 | 4.99                  | up   |
| Lmgp003546 | 4',5'-Dihydroxy-6,8-dimethoxyisoflavone-7-O-galactoside                    | 1.12 | 2.43                  | up   |
| Lmqp010784 | Progesterone                                                               | 1.40 | 8.95 $\times 10^{-4}$ | down |
| Lmhp008744 | 1- $\alpha$ -Linolenoyl-glycerol-2,3-di-O-glucoside*                       | 1.32 | 3.63                  | up   |
| pma3649    | 5-Aminolevulinic Acid                                                      | 1.05 | 2.00                  | up   |
| Jmgn005927 | 2-hydroxynaringenin                                                        | 1.33 | 3.07                  | up   |
| Lhhp120823 | Eugenyl formate                                                            | 1.28 | 2.57                  | up   |
| pme0057    | L-Homocysteine                                                             | 1.03 | 4.10                  | up   |
| pmb0496    | N-Feruloylagmatine                                                         | 1.39 | 5.79                  | up   |
| pmb0764    | 4-Methyl-5-thiazoleethanol                                                 | 1.08 | 2.04                  | up   |
| mws0520    | N-Acetyl-L-tyrosine                                                        | 1.11 | 3.92 $\times 10^{-1}$ | down |
| Zmyn000247 | 2-Hydroxyglutaric Acid                                                     | 1.05 | 6.19                  | up   |
| Lmbn000216 | 3-Methylmalic acid                                                         | 1.05 | 6.19                  | up   |
| pme1286    | S-(5'-Adenosyl)-L-homocysteine                                             | 1.14 | 2.03                  | up   |
| Lmjp003231 | Patuletin-3-O-glucoside                                                    | 1.10 | 2.22                  | up   |
| Lmyp002912 | 2-Hydroxy-7-methoxy-1,4-benzoxazin-3(2H)-one (HMBOA)                       | 1.29 | 3.11 $\times 10^{-1}$ | down |
| mws1589    | D-Panose                                                                   | 1.25 | 3.94 $\times 10^{-1}$ | down |
| pmn001712  | 3-Hydroxy-4-isopropylbenzylalcohol-3-O-sophoroside                         | 1.36 | 3.95 $\times 10^{-1}$ | down |
| mws0248    | Uridine                                                                    | 1.13 | 2.22                  | up   |
| Zmzp000145 | Trimethyllysine                                                            | 1.09 | 2.32                  | up   |
| MWSmce498  | Apigenin-7-O-neohesperidoside (Rhoifolin)*                                 | 1.10 | 2.24                  | up   |
| mws0005    | Tryptamine                                                                 | 1.34 | 3.32                  | up   |
| pmb2857    | L-Glutamic acid-O-glycoside                                                | 1.12 | 2.01                  | up   |
| Lmmn002179 | Methyl salicylate-2-O-glucoside                                            | 1.30 | 9.66                  | up   |
| Lmhp008273 | LysoPE 15:1(2n isomer)*                                                    | 1.05 | 4.93                  | up   |



|            |                                                            |      |                       |      |
|------------|------------------------------------------------------------|------|-----------------------|------|
| mws0889    | D-Threonic Acid                                            | 1.20 | 2.70                  | up   |
| Lmmp002013 | Dihydroferuloylputrescine                                  | 1.38 | 1.49×10               | up   |
| pma1751    | N-(beta-D-Glucosyl)nicotinate                              | 1.26 | 2.42                  | up   |
| Ymjm000143 | 2,3,4-Trihydroxybutyl 6-O-(E)-caffeoyl-β-D-glucopyranoside | 1.27 | 4.40                  | up   |
| Lmtp002942 | Apigenin-6,8-di-C-arabinoside                              | 1.01 | 2.15                  | up   |
| mws1060    | 9-(Arabinosyl)hypoxanthine                                 | 1.24 | 4.81                  | up   |
| Hmjp003400 | 1,7-Bis-(4-hydroxyphenyl)-2,4,6-heptatrienone              | 1.27 | 2.46                  | up   |
| pme0368    | Apigenin-7-O-rutinoside (Isorhoifolin)*                    | 1.30 | 2.84                  | up   |
| Lmdn006025 | 2-Hydroxy-2,3-dihydrogenistein                             | 1.10 | 1.11×10               | up   |
| pmb0752    | 3-O-Feruloylquinic acid                                    | 1.24 | 2.93                  | up   |
| Lmbp002255 | Fraxetin-8-O-glucoside (Fraxin)                            | 1.06 | 2.12                  | up   |
| MWS4354    | N6-methyladenosine                                         | 1.26 | 2.55                  | up   |
| pmb3031    | Tricin-4'-O-glycerol                                       | 1.09 | 1.35×10 <sup>-1</sup> | down |
| Lmpp003930 | Apigenin-7-O-(6"-p-Coumaryl)glucoside                      | 1.21 | 2.02                  | up   |
| pmb0738    | Tricin-7-O-(2"-Sinapoyl)glucoside                          | 1.07 | 7.07                  | up   |

**Table S7.** The list of DAMs in ZH58×CH72/BFL-2.

| Index      | Compounds                                                        | VIP  | Fold Change           | Type |
|------------|------------------------------------------------------------------|------|-----------------------|------|
| Lssp210092 | N-trans-ferulic tyramine*                                        | 1.59 | 2.58×10 <sup>-1</sup> | down |
| pmb0500    | N-p-Coumaroyl-N'-feruloylputrescine                              | 1.62 | 4.98×10 <sup>-1</sup> | down |
| Hmqp002567 | 4-Hydroxycinnamic acid p-hydroxyphenethylamine                   | 1.54 | 9.88×10 <sup>-2</sup> | down |
| MWS0552    | Cis-10-Pentadecenoic Acid(C15: 1)                                | 1.38 | 2.26×10 <sup>-1</sup> | down |
| MWStz221   | N-Cis-Feruloyltyramine*                                          | 1.56 | 2.57×10 <sup>-1</sup> | down |
| Zmyn004449 | 9-Hydroxy-12-oxo-10(E),15(Z)-octadecadienoic acid                | 1.64 | 1.22×10 <sup>-1</sup> | down |
| Hmbp006861 | 1,2-O-Diferuloylglycerol*                                        | 1.54 | 3.04                  | up   |
| pmp000091  | 1,3-O-Diferuloylglycerol*                                        | 1.54 | 3.04                  | up   |
| pme1014    | Menatetrenone (Vitamin K2)                                       | 1.20 | 5.03                  | up   |
| HJN092     | p-Coumaroylferuloylputrescine                                    | 1.58 | 4.82×10 <sup>-1</sup> | down |
| MWSmce083  | Ferulic acid methyl ester                                        | 1.63 | 1.71×10 <sup>-1</sup> | down |
| pme1184    | 2'-Deoxyguanosine                                                | 1.51 | 4.21×10 <sup>-1</sup> | down |
| MWSmce089  | p-Coumaroyltyramine*                                             | 1.64 | 1.13×10 <sup>-1</sup> | down |
| pmn001320  | 1-O-p-Coumaroylglycerol                                          | 1.60 | 4.69×10 <sup>-1</sup> | down |
| mws0918    | Prunetin (5,4'-Dihydroxy-7-methoxyisoflavone)                    | 1.52 | 4.38×10 <sup>-1</sup> | down |
| pmb2789    | 13S-Hydroperoxy-6Z,9Z,11E-octadecatrienoic acid                  | 1.16 | 2.86                  | up   |
| Zmwp005562 | cis-N-p-Coumaroyltyramine*                                       | 1.63 | 1.21×10 <sup>-1</sup> | down |
| Lmbn004685 | 5S,8R-DiHODE; (5S,8R,9Z,12Z)-5,8-Dihydroxyoctadeca-9,12-dienoate | 1.65 | 3.74×10 <sup>3</sup>  | up   |
| pme2914    | 3-Hydroxy-3-methylpentane-1,5-dioic acid                         | 1.12 | 4.03×10 <sup>-1</sup> | down |
| pme1841    | Cadaverine                                                       | 1.60 | 4.36×10 <sup>-1</sup> | down |
| pmp001281  | LysoPC 18:1*                                                     | 1.15 | 2.17                  | up   |
| Lmlp003161 | N-Feruloylputrescine                                             | 1.56 | 2.41×10 <sup>-1</sup> | down |
| mws1433    | N-Feruloyltyramine*                                              | 1.60 | 2.62×10 <sup>-1</sup> | down |
| pme3011    | γ-Aminobutyric acid                                              | 1.55 | 3.93×10 <sup>-1</sup> | down |
| Hmsp000364 | L-Cyclopentylglycine                                             | 1.60 | 3.30×10 <sup>-1</sup> | down |
| MWStz294   | N-Feruloyltryptamine                                             | 1.64 | 6.11×10 <sup>-2</sup> | down |
| pmn001319  | 1-O-Feruloyl-3-O-p-Coumaroylglycerol                             | 1.45 | 2.42                  | up   |
| MWSmce157  | Stachydrine                                                      | 1.63 | 2.03×10 <sup>-1</sup> | down |
| Jmzn006005 | 3,4-Methylenedioxy cinnamyl alcohol                              | 1.63 | 1.25×10 <sup>-1</sup> | down |
| mws1200    | Trans-4-Hydroxycinnamic Acid Methyl Ester                        | 1.62 | 9.81×10 <sup>-2</sup> | down |
| pme2237    | Dulcitol*                                                        | 1.59 | 4.41×10 <sup>-1</sup> | down |
| pme3033    | N,N-Dimethylglycine                                              | 1.51 | 4.81×10 <sup>-1</sup> | down |
| MWSHY0141  | 7-Hydroxy-4-chromone                                             | 1.35 | 4.18×10 <sup>-1</sup> | down |
| Lmhp009034 | LysoPE 16:1*                                                     | 1.65 | 4.17×10 <sup>3</sup>  | up   |
| Lmhp009464 | LysoPE 17:1(2n isomer)*                                          | 1.58 | 4.85×10 <sup>-1</sup> | down |
| Hmbp003234 | 1-O-Caffeoylglycerol                                             | 1.61 | 3.50×10 <sup>-1</sup> | down |
| mws0214    | D-Sorbitol*                                                      | 1.60 | 3.81×10 <sup>-1</sup> | down |
| MWStz202   | cis-Moschamine*                                                  | 1.45 | 9.07×10 <sup>-3</sup> | down |
| Rfmb320    | 1-Methylpiperidine-2-carboxylic acid                             | 1.63 | 1.94×10 <sup>-1</sup> | down |

|            |                                                                            |      |                       |      |
|------------|----------------------------------------------------------------------------|------|-----------------------|------|
| pme0122    | N6-Acetyl-L-lysine                                                         | 1.35 | $4.04 \times 10^{-1}$ | down |
| MWSHY0118  | 5,6,7,4'-Tetramethoxyflavone                                               | 1.11 | $4.41 \times 10^{-1}$ | down |
| MA10074217 | 4-Hydroxyquinoline                                                         | 1.50 | 2.53                  | up   |
| Cmmn013378 | Levopimaric acid*                                                          | 1.16 | 2.92                  | up   |
| mws0133    | Nicotinamide                                                               | 1.59 | $4.12 \times 10^{-1}$ | down |
| pme3968    | 7-Methylguanine*                                                           | 1.22 | $2.26 \times 10^{-1}$ | down |
| pmb1312    | Tricin-4'-O-(guaiacylglycerol)ether-7-O-glucoside                          | 1.45 | $4.34 \times 10^{-1}$ | down |
| pmb0470    | cis-4-Hydroxy-D-proline*                                                   | 1.15 | $3.84 \times 10^{-1}$ | down |
| pmb0962    | L-Lysine-Butanoic Acid                                                     | 1.61 | $3.33 \times 10^{-1}$ | down |
| pme2773    | L-Cystathionine                                                            | 1.53 | $2.09 \times 10^{-1}$ | down |
| Jmbn003691 | 3,4-dihydroxy-allylbenzene-3-O- $\beta$ -D-glucopyranoside                 | 1.58 | $4.93 \times 10^{-1}$ | down |
| Hmcp000405 | Dihydroisopelletierine                                                     | 1.59 | $2.00 \times 10^{-1}$ | down |
| Lmsn009824 | 2 $\alpha$ ,3 $\beta$ ,19 $\alpha$ ,23-Tetrahydroxyolean-12-en-28-oic acid | 1.52 | $2.99 \times 10^{-1}$ | down |
| Lmbp000123 | L-Homomethionine                                                           | 1.20 | 4.37                  | up   |
| Zmpn000638 | 3-Guanidinopropionic acid                                                  | 1.13 | 2.38                  | up   |
| mws1155    | D-Mannitol*                                                                | 1.47 | $4.13 \times 10^{-1}$ | down |
| Lmgp008453 | Albanin A                                                                  | 1.65 | $1.31 \times 10^{-4}$ | down |
| pme1173    | Allopurinol                                                                | 1.49 | $4.53 \times 10^{-1}$ | down |
| Smpn009074 | 2 $\alpha$ ,3 $\alpha$ ,19 $\alpha$ ,23-tetrahydroxy-12-ursen-28-oic acid  | 1.65 | $6.86 \times 10^{-4}$ | down |
| Lmqp000873 | Succinic anhydride                                                         | 1.16 | $2.94 \times 10^{-1}$ | down |
| pmb0770    | N-Feruloylserotonin*                                                       | 1.64 | $3.35 \times 10^{-2}$ | down |
| pmb2795    | 4-Methoxycinnamic acid                                                     | 1.63 | $1.01 \times 10^{-1}$ | down |
| mws1195    | p-Coumaric acid methyl ester                                               | 1.62 | $1.13 \times 10^{-1}$ | down |
| zjgp122326 | Pyridine-4-formyl-O- $\beta$ -D-glucopyranoside                            | 1.39 | 5.75                  | up   |
| pme2693    | N-Acetylputrescine                                                         | 1.23 | $1.69 \times 10^{-1}$ | down |
| pmb2855    | L-Glutamine-O-glycoside                                                    | 1.64 | $2.30 \times 10^{-3}$ | down |
| pme0120    | 5-Aminovaleric acid                                                        | 1.16 | $3.85 \times 10^{-1}$ | down |
| MWS5209    | N-Methyl- $\alpha$ -aminoisobutyric acid                                   | 1.61 | $3.46 \times 10^{-1}$ | down |
| Jmgn005927 | 2-hydroxynaringenin                                                        | 1.54 | 2.04                  | up   |
| pmn001686  | 10,16-Dihydroxypalmitic acid*                                              | 1.17 | $2.66 \times 10^{-1}$ | down |
| mws0520    | N-Acetyl-L-tyrosine                                                        | 1.23 | $1.58 \times 10^{-1}$ | down |
| Lmsp008264 | 4'-Hydroxy-5,6,7-trimethoxyflavone*                                        | 1.54 | $3.60 \times 10^{-1}$ | down |
| pme1286    | S-(5'-Adenosyl)-L-homocysteine                                             | 1.35 | $4.62 \times 10^{-1}$ | down |
| mws0914    | 3,5,7-Trihydroxyflavanone (Pinobanksin)                                    | 1.21 | $2.15 \times 10^{-1}$ | down |
| mws0943    | 1,4-Dihydro-1-Methyl-4-oxo-3-pyridinecarboxamide                           | 1.45 | $3.07 \times 10^{-1}$ | down |
| Hmxp006586 | 5-Hydroxy-7,3',4'-trimethoxyflavone*                                       | 1.51 | $4.22 \times 10^{-1}$ | down |
| MWS4305    | Erythrose                                                                  | 1.12 | $4.97 \times 10^{-1}$ | down |
| pma0633    | N-p-Coumaroylspermine                                                      | 1.45 | $2.38 \times 10$      | up   |
| mws0005    | Tryptamine                                                                 | 1.23 | $2.99 \times 10^{-1}$ | down |
| Lmmp002013 | Dihydroferuloylputrescine                                                  | 1.64 | $3.07 \times 10^{-3}$ | down |
| pma1751    | N-( $\beta$ -D-Glucosyl)nicotinate                                         | 1.13 | $4.38 \times 10^{-1}$ | down |
| pmb3107    | Glucosyringic Acid                                                         | 1.44 | $8.02 \times 10^{-2}$ | down |
| pmb2620    | 3,4-Dimethoxycinnamic acid                                                 | 1.63 | $1.46 \times 10^{-1}$ | down |
| pme1654    | Jasmonic acid                                                              | 1.38 | $1.62 \times 10^{-1}$ | down |
| pmb3075    | 3-O-p-Coumaroylshikimic acid                                               | 1.16 | $4.71 \times 10^{-1}$ | up   |
| Lmdn006025 | 2-Hydroxy-2,3-dihydrogenistein                                             | 1.48 | 2.23                  | down |
| Zmdp001857 | $\gamma$ -Glutamyltyrosine                                                 | 1.23 | $4.33 \times 10^{-1}$ | up   |
| mws0437    | D-Arabitol                                                                 | 1.38 | $3.95 \times 10^{-1}$ | up   |
| mws0213    | Ribitol                                                                    | 1.38 | $3.95 \times 10^{-1}$ | up   |
